# Supplementary material for: Extinction and Optical Depth Retrievals for CALIPSO's Version 4 Data Release
Source: Copernicus journal article supplement (doi:10.5194/amt-2018-182), 2018-06-06
Supplement: Supplementary file [file amt-2018-182-AC2-supplement.pdf]

## **Responses to Referee # 2**

### **Anonymous Referee #2**

Received and published: 11 July 2018

The paper “Extinction and Optical Depth Retrievals for CALIPSO’s Version 4 Data Release” presents and discusses the CALIOP improvements to the extinction retrieval algorithms and the effect of these changes on the extinction and optical depth level 2 lidar estimates. The study falls within the scope of AMT. The authors have done a thorough job and have a rigorous approach. The manuscript is well-written/structured, the presentation clear, the language fluent and the quality of the figures high and the results support the conclusions.

We thank the referee for his / her comments.
